Article: Discoveries

# **Targeted sequencing of venom genes from cone snail genomes reveals coupling between dietary breadth and conotoxin diversity**

Mark A Phuong<sup>1</sup>, Gusti N Mahardika<sup>2</sup>

<sup>1</sup>Department of Ecology and Evolutionary Biology, University of California, Los Angeles, CA  
90095, USA

<sup>2</sup>Animal Biomedical and Molecular Biology Laboratory, Faculty of Veterinary Medicine,  
Udayana University Bali, Jl Seseetan-Markisa 6, Denpasar, Bali 80225, Indonesia

**Corresponding author:**

M. A. Phuong

E-mail: [markphuong@gmail.com](mailto:markphuong@gmail.com)

# **Abstract**

Although venomous taxa provide an attractive system to study the genetic basis of adaptation and speciation, the slow pace of toxin gene discovery through traditional laboratory techniques (e.g., cDNA cloning) have limited their utility in the study of ecology and evolution. Here, we applied targeted sequencing techniques to selectively recover venom gene superfamilies and non-toxin loci from the genomes of 32 species of cone snails (family, Conidae), a hyper diverse group of carnivorous marine gastropods that capture their prey using a cocktail of neurotoxic proteins (conotoxins). We were able to successfully recover conotoxin gene superfamilies across all species sequenced in this study with high confidence (> 100X coverage). We found that conotoxin gene superfamilies are composed of 1-6 exons and adjacent noncoding regions are not enriched for simple repetitive elements. Additionally, we provided further evidence for several genetic factors shaping venom composition in cone snails, including positive selection, extensive gene turnover, expression regulation, and potentially, presence-absence variation. Using comparative phylogenetic methods, we found that while diet specificity did not predict patterns of conotoxin gene superfamily size evolution, dietary breadth was positively correlated with total conotoxin gene diversity. These results continue to emphasize the importance of dietary breadth in shaping venom evolution, an underappreciated ecological correlate in venom biology. Finally, the targeted sequencing technique demonstrated here has the potential to radically increase the pace at which venom gene families are sequenced and studied, reshaping our ability to understand the impact of genetic changes on ecologically relevant phenotypes and subsequent diversification.

# **Introduction**

Understanding the molecular basis for adaptation and speciation is a central goal in evolutionary biology. Past studies have described several genetic characteristics that seem to be associated with rapidly radiating clades or the evolution of novel phenotypes, including evidence for diversifying selection, gene gains and losses, and accelerated rates of sequence evolution (Henrissat *et al.* 2012; Guillén *et al.* 2014; Brawand *et al.* 2014; Cornetti *et al.* 2015; Malmstrøm *et al.* 2016; Pease *et al.* 2016). Although large-

scale comparative genomic studies have vastly increased our knowledge of the genetic changes associated with diversification, the link between genotype and ecologically relevant phenotypes frequently remains unclear. Often, the functional consequences of genetic patterns such as an excess of gene duplicates or regions under positive selection are unknown (Brawand *et al.* 2014; Cornetti *et al.* 2015; Pease *et al.* 2016), limiting our ability to understand how genetic changes shape the evolutionary trajectory of species.

Animal venoms provide an excellent opportunity to study the interplay between genetics and adaptation because of the relatively simple relationship between genotype, phenotype, and ecology. Venoms have evolved multiple times throughout the tree of life (e.g., spiders, snakes, and snails) and play a direct role in prey capture and survival (Barlow *et al.* 2009; Casewell *et al.* 2013). Venoms are composed of mixtures of toxic proteins and peptides that are usually encoded directly by a handful of known gene families (Kordis & Gubensek 2000; Fry *et al.* 2009; Casewell *et al.* 2013). Exceptionally high estimated rates of gene duplication and diversifying selection across these venom genes families are thought to contribute to the evolution of novel proteins and thus changes in venom composition (Duda & Palumbi 1999; Gibbs & Rossiter 2008; Chang & Duda 2012), allowing venomous taxa to specialize and adapt onto different prey species (Kohn 1959a; Daltry *et al.* 1996; Li *et al.* 2005; Barlow *et al.* 2009; Chang & Duda 2016; Phuong *et al.* 2016). Therefore, the study of venomous taxa can facilitate understanding of the genetic contributions to ecologically relevant traits and subsequent diversification.

A fundamental challenge associated with the study of venom evolution is the inability to rapidly obtain sequences from venomous multi-gene families. Traditionally, venom genes were sequenced through cDNA cloning techniques, which can be labor intensive and time-consuming (Gibbs & Rossiter 2008; Chang *et al.* 2015). Although transcriptome sequencing has greatly increased the pace of venom gene discovery (e.g., Casewell *et al.* 2009; Phuong *et al.* 2016), transcriptome sequencing still requires fresh RNA extracts from venom organs, which may be difficult to obtain for rare and/or dangerous species. Targeted sequencing approaches have vastly improved the capacity to obtain thousands of markers across populations and species for ecological and evolutionary studies (Faircloth *et al.* 2012; Bi *et al.* 2012). Until now, these approaches have not been applied to selectively sequence venomous

genomic regions. This may be in part, due to the extraordinary levels of sequence divergence exhibited by venom loci (Gibbs & Rossiter 2008; Chang & Duda 2012), potentially rendering probes designed from a single sequence from one gene family unable to recover any other sequences in the same family (Fig. 1). However, past studies have shown that noncoding regions adjacent to hypervariable mature toxin exons are conserved between species (Nakashima *et al.* 1993, 1995; Gibbs & Rossiter 2008; Wu *et al.* 2013), suggesting that these conserved regions can be used for probe design to potentially recover all venom genes across clades of venomous taxa.

Here, we used a targeted sequencing approach to recover venom genes and study the evolution of venom gene families across 32 species of cone snails from the family, Conidae. Cone snails are a hyper diverse group of carnivorous marine gastropods (> 700 spp.) that capture their prey using a cocktail of venomous neurotoxins (Puillandre *et al.* 2014). Cone snail venom precursor peptides (conotoxins) are typically composed of three regions: the signal region that directs the protein into the secretory pathway, the prepro region that is cleaved during protein maturation, and the mature region that ultimately becomes the mature peptide (Robinson & Norton 2014). In some instances, there exists a ‘post’ region of the peptide following the mature region that is also cleaved during protein processing (Robinson & Norton 2014). Conotoxins are classified into > 40 gene superfamilies (e.g., A superfamily, O1 superfamily, etc.) based on signal sequence identity, though some gene superfamilies were identified based on domain similarities to proteins from other venomous taxa (Robinson & Norton 2014). To examine the evolution of conotoxin gene superfamilies from genomic DNA, we designed probes targeting over 800 non-conotoxin genes for phylogenetic analyses and conotoxins from 12 previously sequenced Conidae transcriptomes (Phuong *et al.* 2016). With the recovered conotoxin loci, we describe several features of conotoxin genes, including its genetic architecture, molecular evolution, expression patterns, and changes in gene superfamily size. Finally, we use comparative phylogenetic methods to test whether diet specificity or dietary breadth can explain patterns of gene superfamily size evolution.

## Results

79

## 80 *Exon capture results*

81 We used custom designed 120bp baits (MYbaits; Mycroarray, Ann Arbor, Michigan, USA) to selectively  
82 target phylogenetic markers and conotoxin genes from 32 Conidae species (Table S1). We sequenced all  
83 samples on a single Illumina HiSeq2000 lane, producing an average of 12.8 million reads per sample  
84 (Table S1). After redefining exon boundaries for the phylogenetic markers, we generated a reference that  
85 consisted of 5883 loci. We recovered an average of 5335 loci (90.7%) across all samples representing  
86 ~0.66 Mb (Megabases) on average (Table S1). For the conotoxin genes, the number of gene models we  
87 assembled containing a conotoxin exon ranged from 281 fragments in *Conus papilliferus* to 2278  
88 fragments in *C. atrimorphus* (Table S1). Approximately 48.8% of the reads mapped to both the  
89 phylogenetic markers and venom genes with 52.3% of these reads being marked as duplicates (Table S1).  
90 Average coverage across the phylogenetic markers was 95.9X, while the average coverage for the  
91 conotoxin exons was 149.6X (Table S1).

92 We recovered representative exons from all 49 conotoxin gene superfamilies targeted, plus exons  
93 from the Q gene superfamily which we did not explicitly target (Fig. S1). Of the 49 targeted gene  
94 superfamilies, ‘capture success’ (defined in Materials and Methods) was 80% or above for 34 gene  
95 superfamilies, even though we did not explicitly target every single transcript (Table S2). For example,  
96 we only targeted 1 sequence of the A gene superfamily from *C. varius*, but we recovered sequences that  
97 showed high identity to every single transcript from the A gene superfamily discovered in the *C. varius*  
98 transcriptome (Table S2). We assessed the ability of targeted sequencing to recover conotoxins from  
99 species that were not explicitly targeted in the bait sequences by calculating the number of previously  
100 sequenced conotoxins (obtained via Genbank and Conoserver (Kaas *et al.* 2010)) recovered in our dataset.  
101 The number of previously sequenced conotoxins from online databases recovered in this study did not  
102 differ depending on whether or not a species was explicitly targeted by our bait design (t-test,  $t = -0.8$ ,  $df$   
103  $= 20.1$ ,  $p\text{-value} > 0.05$ , Table S3).

104

# *Conotoxin genetic architecture*

Through analyses of conotoxin genetic structure across species, we found that the number of exons that comprise a conotoxin transcript ranged from 1 to 6 exons and exon size ranged from 5bp to 444bp (Table S4). Whether or not untranslated regions (UTRs) were adjacent to terminal exons was dependent on the gene superfamily, with some gene superfamilies always having both 5' and 3' UTRs adjacent to terminal exons and some where the 5' or 3' UTRs cannot be found directly adjacent to the terminal exons (Table S4). Regions in conotoxin transcripts identified as the signal region, the mature region, or the post region were most often confined to a single exon (Fig. 2). In contrast, the prepro region was more frequently distributed across more than one exon (Fig. 2).

Because preliminary studies on conotoxin genetic structure suggested that conotoxin introns are enriched for simple repeats (Wu *et al.* 2013; Barghi *et al.* 2015a), we assessed simple repeat content in noncoding regions from both conotoxin and non-conotoxin loci. The percentage of contigs containing a simple repeat in noncoding regions adjacent to conotoxin exons (avg = 52.8%) was lower compared to non-conotoxin loci (avg = 55.6%, Table S5). The percentage length of simple repeats in noncoding regions near conotoxins (avg = 2.9%) was higher than in non-conotoxin loci (avg = 2.6%, Table S5). While paired t-tests found significant differences in the means in both measures of simple repeat abundance, the differences of the means were quite small in both the percentage of contigs containing simple repeats in noncoding regions (diff = 2.8%,  $t = -3.05$ ,  $df = 31$ ,  $p\text{-value} = 0.005$ ) and the percentage length of simple repeats in these regions (diff = 0.3%,  $t = 4.53$ ,  $df = 31$ ,  $p\text{-value} < 0.0001$ ).

# *Conotoxin molecular evolution*

To determine if there are differences in divergence depending on what conotoxin precursor peptide region each exon contains, we quantified the level of sequence divergence between exons and immediately adjacent noncoding regions. Exons containing the signal region were more conserved than their adjacent regions (average relative ratio  $< 1$ , Table S6, Fig. 3, S2). In contrast, all other exon classifications generally showed the opposite pattern, where the exons were typically more divergent relative to their

adjacent noncoding regions (average relative ratio > 1, Table S6, Fig. 3, S2). The largest contrast in divergence between exons and adjacent noncoding regions came from exons containing the mature region, where the coding region was on average 2.9 times more divergent than regions surrounding the exon (Table S6, Fig. 3, S2). For comparison, exons from non-conotoxin genes were more conserved than their adjacent regions (relative exon to adjacent region divergence ratio < 1, Fig. 3).

### *Conotoxin expression*

The proportion of conotoxin genes expressed per gene superfamily was highly variable (Table S7) and the exact proportion depended on the gene superfamily and the species. In several cases, all gene copies of a gene superfamily were not expressed in the transcriptome (e.g., *Conus ebraeus*, A gene superfamily, 0/9 copies expressed, Table S7), and in other cases, all copies were expressed in the transcriptome (e.g., *C. californicus*, O3 gene superfamily, 3/3 copies expressed, Table S7). The average proportion of gene copies expressed per gene superfamily per species was 45% (range: 24% – 63%, Table S7).

### *Conotoxin gene superfamily size evolution*

With a concatenated alignment of 4441 exons representing 573854bp, we recovered a highly supported phylogeny with all but 4 nodes having  $\leq 95\%$  bootstrap support (Fig. 4). Total conotoxin gene diversity ranged from as low as 120 in *C. papilliferus* to as high as 859 in *C. coronatus* (Fig. 4). 25 gene superfamilies showed evidence of phylogenetic signal in gene superfamily size, such that closely related species tended to have similar gene superfamily sizes (Table S8). For example, nearly all of the gene copies from the A superfamily in a clade consisting of *C. mustelinus*, *C. capitaneus*, *C. miles*, *C. vexillum*, and *C. rattus* seemed to have been lost from the genome, while a clade composed of *C. lischkeanus*, *C. muriculatus*, and *C. lividus* seemed to have expanded in membership size (Fig. 4). CAFE (Han *et al.* 2013) estimates of net gene gains and losses showed that species-specific net conotoxin expansions and contractions are scattered throughout the phylogeny (Fig. 4, Fig. S3).

## *Diet and conotoxin gene superfamily evolution*

We used comparative phylogenetic methods and extensive prey information from the literature to examine the impact of diet specificity (i.e. what prey a cone snail feeds upon) and dietary breadth (i.e., how many prey species a cone snail feeds upon) on the evolution of conotoxin gene diversity. Neither diet specificity nor dietary breadth was correlated in changes with gene superfamily size (D-PGLS [distance-based phylogenetic generalized least squares],  $p > 0.05$ ). While diet specificity did not predict changes in total conotoxin diversity (PGLS,  $p > 0.05$ ), we found a significant positive relationship between dietary breadth and total conotoxin diversity in both the full conotoxin dataset (PGLS,  $p < 0.05$ , Fig. 5) and the conotoxin dataset containing gene superfamilies that had  $> 80\%$  capture success (PGLS,  $p < 0.001$ ).

## **Discussion**

### *Targeted sequencing and conotoxin discovery*

Through targeted sequencing of conotoxins in cone snails, we demonstrate the potential to rapidly obtain venom sequences at high coverage ( $> 100X$ , Table S1) from species for which no venom information is available and without the need of RNA from the venom duct. This is remarkable, given that alignments in amino acid sequences between mature regions of a single gene superfamily within a single individual can be incomprehensible (Fig. 1) due to the high evolutionary rates of the mature region (Duda & Palumbi 1999). Effective capture of conotoxin gene superfamilies was possible in part because conotoxin exons were often directly adjacent to conserved UTRs, which were targeted in the design (Table S4). For several gene superfamilies, exons containing the prepro region or the mature region were not immediately adjacent to the UTRs – thus, these gene superfamilies were not as effectively recovered from species not explicitly targeted by the baits (e.g., prepro region, gene superfamily O3, Fig. S1). However, we recovered intron sequences in this study that can be used in future bait designs to anchor probes to effectively recover the entire coding region of a conotoxin transcript because adjacent noncoding regions are often evolving at a much slower rate than the coding region (Table S6, Fig. 3, S2). While it has been recognized for decades that cone snails collectively harbor tens of thousands of biologically relevant



proteins for fields such as molecular biology and pharmacology in their venoms (Olivera & Teichert 2007; Lewis 2009), traditional techniques for conotoxin sequencing (e.g., cDNA cloning) have barely begun to uncover and characterize the full breadth of conotoxin diversity. The targeted sequencing technique presented in this study has the potential to fundamentally reshape the speed at which conotoxins are discovered, potentially having significant implications for the study of conotoxins in molecular biology, pharmacology, ecology, and evolution.

When compared to conotoxin sequences available on Genbank and ConoServer, we found that we were able to recover approximately the same proportion of previously sequenced conotoxins across species regardless of whether the species was explicitly targeted with the baits (Table S3). We performed a coarse investigation of database conotoxins and determined potential reasons for why we were not able to recover certain previously sequenced conotoxins. These reasons include: (a) the species in the database was misidentified, (b) the database conotoxin had no reliable reference in the literature, (c) the conotoxin was present in our species, but we could not recover it with the current bait design, and (d) the conotoxin was recoverable (i.e., high sequence similarity to bait sequences designed in this study), but the gene was not present in the genome of the individual used in this study, indicative of presence-absence variation shaping the venom repertoire of cone snail species. Future studies studying the genomic content of conotoxins from the genome will enable understanding of the contributions of presence-absence variation to the evolution of cone snail venom composition.

### *Genetic characteristics of conotoxins*

Previous studies noted the enrichment of simple repetitive elements (e.g., ATATATAT) in noncoding regions adjacent to conotoxin loci, suggesting that these repetitive regions may be important for conotoxin gene splicing and the regulation of gene expression (Wu *et al.* 2013; Barghi *et al.* 2015a). Although our comparisons of simple repeat content between conotoxin and non-conotoxin exons showed that a higher proportion of contigs contained simple repeats near non-conotoxin exons and simple repeats constituted a greater proportion of noncoding length near conotoxin exons, these differences were quite

small (Table S5), suggesting that the presence of simple repeats are not unique to conotoxins. This discrepancy occurred between this study and past work because previous studies did not compare repeat content to non-conotoxin loci (Wu *et al.* 2013; Barghi *et al.* 2015a), underscoring the importance of making appropriate comparisons to identify features that may be exclusive to conotoxin evolution.

The ratio of exon to noncoding divergence depended on what conotoxin region was encoded by the exon, aligning with previous work characterizing rate variation in snake venom proteins (Nakashima *et al.* 1993, 1995; Gibbs & Rossiter 2008). Specifically, the exon containing the signal region was conserved and evolved much more slowly than adjacent noncoding regions (Table S6, Fig. 3, S2). This is similar to the pattern found in non-conotoxin exons (Fig. 3), indicative of purifying selection removing deleterious mutations from coding regions of critically important proteins (Hughes & Yeager 1997). In contrast, the exon diverges faster than the noncoding regions in all other exons, with the clearest difference between exon and noncoding region divergence seen in the exon containing most or all of the mature toxin region. This same pattern is also seen in other genes under positive selection, such as PLA2 genes in snakes (Nakashima *et al.* 1993, 1995; Gibbs & Rossiter 2008) and fertilization genes in abalone (Metz *et al.* 1998). Although we did not use traditional methods to test for positive selection (e.g., MK tests, etc.), positive selection is well documented in cone snails (Duda & Remigio 2008; Duda 2008; Puillandre *et al.* 2010) and is therefore inferred to shape patterns of increased divergence in coding regions relative to noncoding regions.

We found that on average, cone snails only express a fraction of the conotoxin genes available in their genomes, concurring with similar reports from smaller sets of gene superfamilies (Chang & Duda 2012, 2014; Barghi *et al.* 2015a). Several reasons could lead to this pattern. First, it is known that expression changes throughout an individual's lifetime in cone snails (Barghi *et al.* 2015b; Chang & Duda 2016), suggesting that the complement of genes expressed in the transcriptomes from Phuong *et al.* 2016 represent the adult conotoxins, and genes not discovered in the transcriptome but recovered from the genome are genes that are expressed in other life stages. Second, prey taxa available to cone snail species change with geography and so do the conspecifics it must compete against (Kohn 1959a, 1978; Kohn &

Nybakken 1975; Duda & Lee 2009; Chang *et al.* 2015); therefore, different genes may be turned on or off in different geographic localities depending on the prey resources available and the composition of competitors in an individual's environment. Finally, some of the conotoxin genes in the genome may not be expressed because they are no longer functional and have become pseudogenized. Future work comparing patterns of expression relative to genomic availability will be able to disentangle the impact of conotoxin expression on changes to the venom phenotype.

We detected evidence for phylogenetic signal in the membership size of 25 gene superfamilies (Table S8, Fig. 4), suggesting that history plays a role in shaping gene gains and losses in cone snails. We note that uncovering evidence for phylogenetic signal in gene superfamily size does not imply that natural selection has not played a role in the evolution of venom as implied in (Gibbs *et al.* 2013). As described in Revell *et al.* (2008), evolutionary processes should not be inferred from patterns of phylogenetic signal because several contrasting models of trait evolution can lead to similar amounts of phylogenetic signal. Through CAFE analyses, we also showed that venom composition is shaped by both net gains and losses in the entire genomic content of conotoxins (Fig. 4, Fig. S3). This result is in line with past studies showing that gene turnover is a fundamental characteristic shaping species' genic venom content (Duda & Palumbi 1999; Chang & Duda 2012; Dowell *et al.* 2016).

## *Diet and venom evolution*

Why do cone snails vary in conotoxin gene superfamily size? Contrary to the popular assumption that particular gene superfamilies are associated with certain prey items (e.g, Kaas *et al.* 2010; Jin *et al.* 2013), diet categories did not predict changes in gene superfamily size or total conotoxin diversity. This result aligns with a growing body of literature suggesting that the specific prey a species feeds upon may not accurately predict patterns of conotoxin evolution (Puillandre *et al.* 2012; Chang *et al.* 2015; Phuong *et al.* 2016). While dietary breadth also did not predict changes in gene superfamily size, we found a significant positive relationship with total conotoxin diversity (Fig. 5), aligning with several studies showing a tight coupling between dietary breadth and venom gene diversity in cone snails at nearly all

biological scales of organization (Duda & Lee 2009; Chang *et al.* 2015; Chang & Duda 2016; Phuong *et al.* 2016). The importance of dietary breadth shaping venom evolution remains underappreciated and untested in other venomous systems despite strong signals across several studies in cone snails. Future work examining the role of dietary breadth in shaping the evolution of venom in other venomous taxa will greatly advance our understanding between the interplay between diet and venom. The lack of a relationship between dietary breadth and changes in conotoxin gene superfamily size suggests that venom should be characterized as an aggregate trait rather than decomposed into individual parts to fully assess the impact of dietary breadth on conotoxin evolution. Indeed, conotoxin gene superfamilies provide little information on protein function and it is known that proteins with similar functions can evolve convergently in different gene superfamilies (Kaas *et al.* 2010; Puillandre *et al.* 2012; Robinson & Norton 2014). Further, studies have documented synergistic and complementary effects of conotoxins on prey species, suggesting that selection may act on the entire cocktail rather than individual components (Olivera 1997).

## Conclusions

Through targeted sequencing of conotoxin genes, we provide additional evidence for several genetic characteristics that shape venom composition in cone snails, including presence-absence variation, positive selection, regulation of gene expression, and gene turnover. In addition, we find that variation in conotoxin diversity tracks changes in dietary breadth, suggesting that species with more generalist diets contain a greater number of conotoxin genes in their genome. Given that increased gene diversity is thought to confer an increased capacity for evolutionary change and species diversification (Kirschner & Gerhart 1998; Yang 2001; Malmstrøm *et al.* 2016), generalist species may speciate at faster rates than species with specialist diets. The targeted sequencing technique presented in this paper provides the necessary methodological advancement to rapidly sequence toxin genes across diverse clades of species, allowing tests of the relationship between ecology, toxin gene diversity, and higher order biodiversity patterns to be realized in future work.

## Materials and Methods

### *Bait design and data collection*

To recover markers for phylogenetic analyses, we targeted 886 protein coding genes representing 728,860bp. 482 of these genes were identified to be orthologous in Pulmonate gastropods (Teasdale *et al.* 2016) and we identified the remaining 404 genes using a reciprocal blast approach with 12 Conidae transcriptomes from (Phuong *et al.* 2016). For each gene, we chose the longest sequence from one of the 12 Conidae transcriptomes as the target sequence. For 421 of these genes, we used the entire length of the sequence as the target sequence, while for the remaining genes, we sliced the target sequences into smaller components based on exon/intron boundaries inferred with EXONERATE (Slater & Birney 2005) using the *Lottia gigantea* genome as our reference. If exons were below 120bp (i.e., our desired bait length) in length, but longer than 50bp, we generated chimeric target sequences by fusing immediately adjacent exons. We tiled bait sequences every 60bp across each target sequence. For the conotoxin genes, we targeted 1147 conotoxins discovered from an early analysis of the 12 transcriptomes described in (Phuong *et al.* 2016). These sequences represent regions targeting 49 gene superfamilies and we included the full protein coding region plus 100bp of the 5' and 3' untranslated regions in our bait design when possible (Table S2). We tiled bait sequences every 40 bp across each conotoxin target sequence.

We obtained tissue samples for 32 Conidae species through field collections in Australia and Indonesia and from the collections at the Australian Museum in Sydney, Australia (Table S1). We extracted genomic DNA using an EZNA Mollusc DNA kit (Omega Bio-Tek, Doraville, GA, USA) and prepared index-specific libraries following the Meyer and Kircher (2010) protocol. We pooled 8 samples at a total concentration of 1.6µg DNA per capture reaction and allowed the baits to hybridize with the DNA for ~24 hours. We substituted the universal blockers provided with the MYbaits kit with xGEN blockers (Integrated DNA Technologies). After hybridization, we sequenced all 32 samples on a single lane HiSeq2000 lane with 100bp paired-end reads.

313

# 314 *Data assembly, processing, and filtration*

315 We trimmed reads for quality and adapter contamination using Trimmomatic (Bolger *et al.* 2014), merged  
316 reads using FLASH (Magoč & Salzberg 2011), generated assemblies for each sample using SPAdes  
317 (Bankevich *et al.* 2012) and reduced redundancy in the assemblies with cap3 (Huang & Madan 1999) and  
318 cd-hit (Li & Godzik 2006).

319 For the phylogenetic markers, we used BLAST+ (Altschup *et al.* 1990) to associate assembled  
320 contigs with the target sequences and used EXONERATE to redefine exon/intron boundaries because  
321 either (a) exon/intron boundaries were never denoted or (b) previously defined exons were composed of  
322 smaller fragments. For each sample, we used bowtie2 (Langmead & Salzberg 2012) to map reads to a  
323 reference containing only the contigs associated with the original target sequences and marked duplicates  
324 using picard-tools (<http://broadinstitute.github.io/picard>). We masked all positions that were below 5X  
325 coverage and removed the entire sequence if > 30% of the sequence was masked. To filter potential  
326 paralogous sequences in each species, we calculated heterozygosity (number of heterozygous sites/total  
327 number of sites) for each locus by identifying heterozygous positions using samtools and bcftools (Li *et*  
328 *al.* 2009) and removed loci that were at least two standard deviations away from the mean heterozygosity.

329 For the conotoxin sequences, it is known that traditional assemblers perform poorly in  
330 reconstructing all potential conotoxin gene copies (Lavergne *et al.* 2015; Phuong *et al.* 2016). To  
331 ameliorate this issue, we reassembled conotoxin genes using the assembler PRICE (Ruby *et al.* 2013),  
332 which employs iterative mapping and extension using paired read information to build out contigs from  
333 initial seed sequences. To identify potential seed sequences for contig extension, we first mapped reads to  
334 the entire assembly outputted by SPAdes using bowtie2. Then, we identified all sequence regions that  
335 locally aligned to any part of the original conotoxin target sequences via blastn; these regions represented  
336 our preliminary seed sequences. We kept all preliminary seed sequences that were at least 100 bp (read  
337 length of samples in this study) and extended these seeds to 100bp if the alignable region was below that  
338 threshold. When extending these initial regions, we used Tandem Repeats Finder (Benson 1999) to

identify simple repeats and minimize the presence of these genomic elements in the preliminary seed sequences. Often, only a subset of conotoxins are fully assembled with traditional assemblers (Phuong *et al.* 2016). However, when reads are mapped to these assemblies, unique conotoxin loci are similar enough to each other that relaxed mapping parameters will allow multiple copies to map to the contigs that were assembled. Therefore, multiple conotoxin copies will often map to each preliminary seed sequence. To generate seed sequences for all unique conotoxin loci, we used the python module pysam (<https://github.com/pysam-developers/pysam>) to pull all reads that mapped to regions of contigs representing the preliminary seed sequence and we reconstructed contigs from these reads using cd-hit and cap3. From these reconstructed contigs, we used blastn to identify >100bp regions that matched the original preliminary seed and used these hits as our final seeds. We merged all final seeds that were 100% identical using cd-hit, mapped reads to these seeds using bowtie2, and used PRICE to re-assemble and extend each seed sequence under 5 MPI values (90%, 92%, 94%, 96%, 98%) with only the set of reads that mapped to that initial seed. A sequence was successfully reassembled if it shared  $\geq 90\%$  identity to the original seed sequence and if the final sequence was longer than the initial seed. For each seed sequence, we only retained the longest sequence out of the 5 MPI iterations for downstream filtering.

In order to generate a conotoxin reference database containing sequences that included both exons and adjacent noncoding regions, we used blastn and exonerate on species that were used in the bait design to (a) perform species-specific searches between our reassembled contigs and a reference containing all conotoxins in (Phuong *et al.* 2016) and (b) define exon/intron boundaries on our reassembled contigs. In cases where a predicted terminal exon (i.e., the first or last exon of a conotoxin) was short (< 40 bp) and did not blast to any reassembled contig in our exon capture dataset, we replaced the reference conotoxin from Phuong et al 2016 with a conotoxin containing the adjacent UTR regions to aid in the sequence searches. We generated conotoxins with UTR regions using the PRICE algorithm as described above because the reference conotoxins from the final dataset in Phuong *et al.* 2016 did not include the UTR regions. With this final conotoxin reference containing sequences with exons and introns pre-defined, we used blastn to associate contigs with this reference in every species and used exonerate,

blastx, and tblastn to define exon/intron boundaries. When exon/intron boundaries could not be defined through these methods, we guessed the boundaries by aligning the assembled contig to the reference sequence using MAFFT and denoted the boundaries across the region of overlap with the exon in the reference sequence. For each sample, we mapped reads using bowtie2, accounted for duplicates using picard-tools, and retained sequences that had at least 10x coverage across the exons defined within each contig. We masked regions below 10x coverage and used cd-hit to merge contigs that were  $\geq 98\%$  similar, generating our final conotoxin gene models. Finally, we used HapCUT (Bansal & Bafna 2008) to generate all unique haplotypes across coding regions.

To assess the overall effectiveness of our targeted sequencing experiment, we calculated (a) percent of reads aligned to intended targets, (b) percent duplicates, and (c) average coverage across targeted regions. To assess capture success of conotoxins, we divided the number of conotoxin transcripts successfully recovered in the exon capture dataset by the number of conotoxin transcripts discovered in Phuong *et al.* 2016 for each gene superfamily. We defined a conotoxin transcript to be successfully sequenced if  $> 80\%$  of the transcript was recovered in the exon capture experiment with  $> 90\%$  identity. To assess the ability of targeted sequencing to recover gene superfamily sequences from species that were not explicitly targeted in the bait sequences, we calculated the number of previously sequenced conotoxins that match contigs recovered in our dataset. We gathered conotoxin sequences from Genbank and ConoServer (Kaas *et al.* 2010) with species names that correspond to species in this study, merged sequences with 98% identity using cdhit, and used blastn to perform species-specific searches. We defined a conotoxin as successfully sequenced if the hypervariable mature toxin coding region aligned with  $\geq 95\%$  identity to a sequence in our dataset. We used an unpaired t-test to determine whether the probability of recovering a previously sequenced conotoxin differed depending on whether or not that species' conotoxin repertoire was incorporated in the bait sequences.

*Conotoxin genetic architecture*



To characterize conotoxin genetic architecture, we quantified the following values: (a) the number of exons comprising a conotoxin transcript, (b) average length of each exon, and (c) the size range of exon length. We also determined the proportion of terminal exons adjacent to UTRs by conducting sequence searches (via blastn) between contigs containing terminal exons against a database of conotoxins from Phuong *et al.* 2016 that were reassembled to contain the UTRs. To determine how traditional conotoxin precursor peptide regions are distributed among exons, we calculated the average proportion of each conotoxin region found on each exon in every gene superfamily. We defined regions of the Phuong *et al.* 2016 transcripts using ConoPrec (Kaas *et al.* 2012). We restricted these conotoxin genetic structure analyses to transcripts from Phuong *et al.* 2016 that were successfully recovered in the exon capture dataset and that were retained after clustering with cd-hit (similarity threshold = 98%). We performed clustering to avoid over-inflating estimates because unique transcripts from Phuong *et al.* (2016) may have originated from the same gene.

To determine whether conotoxin loci are enriched for simple repetitive elements, we quantified the amount of simple repeats in noncoding regions adjacent to conotoxin exons vs. noncoding regions adjacent to non-conotoxin exons. If multiple exons were found on the same contig, we split the sequences at the midpoint in the intron region to standardize the data because most contigs contain only one exon. We used Tandem Repeat Finder to identify repeats and retained results when (a) the repeat pattern size was between 1 to 6 (i.e., mono-nucleotide repeats to hexa-nucleotide repeats), (b) the pattern was repeated at least 5 times, and (c) patterns within a repeat shared 90% identity with each other. We calculated (a) the proportion of contigs containing simple repeats and (b) the proportion of bases that comprised of simple repeats and tested the differences between conotoxins and non-conotoxin loci using paired t-tests.

### *Conotoxin molecular evolution*

We first classified all exons into conotoxin precursor peptide regions. For species with transcriptome data, we first labeled exons as either the signal region or the mature region by identifying the exons containing the largest proportion of these separate regions. Then, exons between the signal and

mature exon were labeled as the prepro exon(s) and exons after the mature region were labeled as the post exons. Gene superfamilies containing only a single exon were denoted as such. We then used blastn to classify sequences without transcriptome data into these conotoxin precursor peptide regions. For each functional category within each gene superfamily, we calculated uncorrected pairwise distances between all possible pairwise comparisons. To avoid spurious alignments, we only considered comparisons within clusters that clustered with cd-hit at an 80% threshold and we excluded comparisons if (a) the alignment length of the two exons was 20% greater than the longer exon, (b) the align-able noncoding region was below 50bp, or (c) the shorter exon's length was less than 70% of the length of the longer exon. We calculated separate pairwise distance estimates for regions of the alignment that contained the exon and regions of the alignment that contained the noncoding DNA. We excluded region-labeled exons within superfamilies from this analysis that had less than 50 possible comparisons. For comparison, we also calculated pairwise distances between exons and noncoding regions across our phylogenetic markers which represent non-conotoxin exons, filtered with similar criteria described above.

### *Conotoxin expression*

To characterize variation in expression patterns among species per gene superfamily, we calculated the number of conotoxin genes expressed in species with transcriptome data divided by the number of genes available in the genome. We restricted these analyses to instances where 90% of the unique mature toxins were recovered for a gene superfamily within a species. To estimate gene superfamily size, we used the exon labeled as containing most or all of the mature region. We defined a conotoxin gene as expressed if we retained a blast hit with 95% identity to a unique mature toxin sequence found in the transcriptome.

### *Gene superfamily size change estimation*

To compare and contrast gene superfamily size changes between species, we used the total number of exons containing most or all of the signal region as our estimate of gene superfamily size

because exons containing the signal regions are relatively conserved across species (Robinson & Norton 2014) and thus have the highest confidence of being recovered through exon capture techniques. To quantify and test the amount of phylogenetic signal in conotoxin gene diversity, we estimated Pagel's lambda (Pagel 1997) in the R package phytools (Revell 2012). Lambda values range from 0 (phylogenetic independence) to 1 (phylogenetic signal) and p-values < 0.05 represent significant departure from a model of random trait distribution across species with respect to phylogeny. To estimate conotoxin gene superfamily gains and losses along every branch, we used the program CAFEv3.1 (Han *et al.* 2013), which uses a stochastic gene birth-death process to model the evolution of gene family size. As input, we used a time-calibrated phylogeny and estimates of gene superfamily size for 37 superfamilies that were present in at least 2 taxa. To estimate a time-calibrated phylogeny, we aligned loci that had at least 26 species using MAFFT (Katoh *et al.* 2005) and used a concatenated alignment to build a phylogeny in RAxML under a GTRGAMMA model of sequence evolution (Stamatakis 2006). We time-calibrated the phylogeny with the program r8s (Sanderson 2003) using two previous fossil calibrations described in cone snails (Duda Jr. *et al.* 2001). We excluded *Californiconus californicus* from the CAFE analysis due to optimization failures.

#### *Diet and conotoxin gene superfamily size evolution*

To examine the role of diet specificity and dietary breadth on conotoxin gene superfamily size evolution and total conotoxin diversity, we retrieved prey information from the literature (Kohn 1959a; b, 1966, 1968, 1978, 1981, 2001, 2003, 2015; Marsh 1971; Kohn & Nybakken 1975; Taylor 1978, 1984, 1986; Taylor & Reid 1984; Nybakken & Perron 1988; Kohn & Almasi 1993; Reichelt & Kohn 1995; Kohn *et al.* 2005; Nybakken 2009; Chang *et al.* 2015). For diet specificity, we classified prey items into one of 27 different prey categories (Table S9). For dietary breadth, we retrieved estimates of the Shannon's diversity index ( $H'$ ) or calculated it if there were at least 5 prey items classified to genus with a unique species identifier. When multiple  $H'$  values were obtained for a species, we averaged them because species will consume different sets of prey taxa depending on geography. Raw data are available in Table

S9. To examine the impact of prey group and dietary breadth on changes in gene superfamily size, we used D-PGLS (distance-based phylogenetic generalized least squares), a phylogenetic regression method capable of assessing patterns in high-dimensional datasets (Adams 2014). To reduce redundancy among prey group variables, we removed variables that were 80% correlated with each other using the `redun` function in the R package `Hmisc`. We used the total number of exons containing the signal region as our estimate of gene superfamily size. To convert gene superfamily size counts into continuous variables, we transformed the data into chi-squared distances between species in ‘conotoxin gene superfamily space’ using the `deostand` function in the R package `vegan` (Oksanen *et al.* 2016). To examine the impact of diet specificity and dietary breadth on total conotoxin diversity, we used a PGLS analysis implemented in the `caper` package within R (Orme 2013). We  $\ln$ -transformed total conotoxin diversity for the PGLS analysis. We performed all analyses with the full dataset and a subset of the data that only included gene superfamilies with > 80% capture success. We did not perform any analyses with *C. californicus* because it is regarded as an outlier species amongst the cone snails due to its atypical diet and its deep relationship with the rest of Conidae (Kohn 1966; Puillandre *et al.* 2014).

## Acknowledgements

We thank DST Hariyanto, MBAP Putra, MKAA Putra, and the staff at the Indonesian Biodiversity Research Center in Denpasar, Bali for assistance in the field in Indonesia; F Criscione, F Köhler, A Moussalli, A Hogget, and L Vail for assistance in the field at the Lizard Island Research Station in Australia; M Reed, A Hallan, and J Waterhouse for access to specimens at the Australian Museum in Sydney, Australia; J Finn, M Mackenzie, and M Winterhoff for access to specimens at the Museum Victoria in Melbourne, Australia; K Bi, L Smith, and A Moussalli for advice on bait design; the Evolutionary Genetics Lab at UC Berkeley for laboratory support; MCW Lim and J Chang for thoughtful advice and discussions; N Puillandre, S Prost, and S Robinson for insightful comments on earlier versions of this manuscript. This work used the Extreme Science and Engineering Discovery Environment (XSEDE), which is supported by National Science Foundation grant number ACI-1053575. This work

was supported by a Grants-in-Aid of research from Sigma Xi, a Grants-in-Aid of Research from the Society for Integrative and Comparative Biology, a research grant from the Society of Systematic Biologists, a Student Research Award from the American Society of Naturalists, a National Science Foundation Graduate Research Opportunities Worldwide to Australia, the Lerner Gray Fund for Marine Research from the American Museum of Natural History, research grants from the Department of Ecology and Evolutionary Biology at UCLA, a small award from the B Shaffer Lab, a National Science Foundation Graduate Research Fellowship, an Edwin W. Pauley fellowship, and a Chateaubriand fellowship awarded to MAP. This work used the Vincent J. Coates Genomics Sequencing Laboratory at UC Berkeley, supported by NIH S10 Instrumentation Grants S10RR029668 and S10RR027303. We thank the Indonesian Ministry of State for Research and Technology (RISTEK, permit number 277/SIP/FRP/SM/VIII/ 2013) for providing permission to conduct fieldwork in Bali. The *C. californicus* specimen was collected under a California Department of Fish and Wildlife collecting permit granted to WF Gilly (SC-6426).

**Figure 1. A superfamily conotoxins from *Conus lividus* described in the transcriptome from Phuong et al. 2016.**

**Figure 2. Histograms showing the frequency of the largest proportion of conotoxin precursor peptide regions found on a single exon in Conidae genomes.**

**Figure 3. Scatterplot of uncorrected pairwise distances for select gene superfamilies and non-conotoxin loci between exons and adjacent noncoding regions.**

**Figure 4. Diet and conotoxin evolution in a phylogenetic context.** Time-calibrated maximum likelihood phylogeny of 32 Conidae species generated from concatenated alignment of 4441 exons. Total conotoxin diversity and size estimates for commonly studied gene superfamilies displayed next to tip

names. Branches are colored base on net gains or losses in total conotoxin diversity based on CAFE analyses. Recognized subgenera are alternately colored pink.

**Figure 5. Scatterplot of total conotoxin gene diversity and dietary breadth.** Graph labeled with correlation coefficient.

**Figure S1. Conotoxin diversity per gene family per region in a phylogenetic context.**

**Figure S2. Scatterplots of all gene superfamilies showing the relationship between exon divergence and noncoding divergence.** Divergence was estimated by calculating uncorrected pairwise distances.

**Figure S3. CAFE net gene gains and losses plotted across a time-calibrated phylogeny of cone snails.** Values on branches represent the number of conotoxin genes gained or loss along that branch. Total conotoxin diversity listed next to species names.

## Literature cited

Adams DC (2014) A method for assessing phylogenetic least squares models for shape and other high-dimensional multivariate data. *Evolution*, **68**, 2675–2688.

Altschup SF, Gish W, Pennsylvania T, Park U (1990) Basic Local Alignment Search Tool. *Journal of Molecular Biology*, **215**, 403–410.

Bankevich A, Nurk S, Antipov D *et al.* (2012) SPAdes: A New Genome Assembly Algorithm and Its Applications to Single-Cell Sequencing. *Journal of Computational Biology*, **19**, 455–477.

Bansal V, Bafna V (2008) HapCUT: An efficient and accurate algorithm for the haplotype assembly problem. *Bioinformatics*, **24**, 153–159.

Barghi N, Concepcion GP, Olivera BM, Lluisma AO (2015a) Structural features of conopeptide genes

inferred from partial sequences of the *Conus tribblei* genome. *Molecular Genetics and Genomics*,  
**291**, 411–422.

Barghi N, Concepcion GP, Olivera BM, Lluisma AO (2015b) Comparison of the venom peptides and  
their expression in closely related *Conus* species: insights into adaptive post-speciation evolution of  
*Conus* exogenomes. *Genome Biology and Evolution*, **7**, 1797–1814.

Barlow A, Pook CE, Harrison RA, Wüster W (2009) Coevolution of diet and prey-specific venom  
activity supports the role of selection in snake venom evolution. *Proceedings. Biological sciences /*  
*The Royal Society*, **276**, 2443–2449.

Benson G (1999) Tandem Repeats Finder: a program to analyse DNA sequences. *Nucleic Acids Res.*, **27**,  
573–578.

Bi K, Vanderpool D, Singhal S *et al.* (2012) Transcriptome-based exon capture enables highly cost-  
effective comparative genomic data collection at moderate evolutionary scales. *BMC Genomics*, **13**,  
403.

Bolger AM, Lohse M, Usadel B (2014) Trimmomatic: a flexible trimmer for Illumina sequence data.  
*Bioinformatics (Oxford, England)*, 1–7.

Brawand D, Wagner CE, Li YI *et al.* (2014) The genomic substrate for adaptive radiation in African  
cichlid fish. *Nature*.

Casewell NR, Harrison RA, Wüster W, Wagstaff SC (2009) Comparative venom gland transcriptome  
surveys of the saw-scaled vipers (Viperidae: Echis) reveal substantial intra-family gene diversity  
and novel venom transcripts. *BMC Genomics*, **10**, 564.

Casewell NR, Wüster W, Vonk FJ, Harrison RA, Fry BG (2013) Complex cocktails: the evolutionary  
novelty of venoms. *Trends in ecology & evolution*, **28**, 219–29.

Chang D, Duda TF (2012) Extensive and continuous duplication facilitates rapid evolution and  
diversification of gene families. *Molecular biology and evolution*, **29**, 2019–29.

Chang D, Duda TF (2014) Application of community phylogenetic approaches to understand gene  
expression: differential exploration of venom gene space in predatory marine gastropods. *BMC*

*evolutionary biology*, **14**, 123.

Chang D, Duda TF (2016) Age-related association of venom gene expression and diet of predatory gastropods. *BMC Evolutionary Biology*, **16**, 27.

Chang D, Olenzek AM, Duda Jr. TF (2015) Effects of geographical heterogeneity in species interactions on the evolution of venom genes. *Proceedings of the Royal Society B*.

Cornetti L, Valente LM, Dunning LT *et al.* (2015) The genome of the “great speciator” provides insights into bird diversification. *Genome Biology and Evolution*, **7**, 2680–2691.

Daltry JC, Wüster W, Thorpe RS (1996) Diet and snake venom evolution. *Nature*.

Dowell NL, Giorgianni MW, Kassner VA *et al.* (2016) The deep origin and recent loss of venom toxin genes in rattlesnake. *Current Biology*, **In press**, 2434–2445.

Duda TF (2008) Differentiation of venoms of predatory marine gastropods: divergence of orthologous toxin genes of closely related *Conus* species with different dietary specializations. *Journal of molecular evolution*, **67**, 315–21.

Duda Jr. TF, Kohn AJ, Palumbi SR (2001) Origins of diverse feeding ecologies within *Conus*, a genus of venomous marine gastropods. *Biological Journal of the Linnean Society*, **73**, 391–409.

Duda TF, Lee T (2009) Ecological release and venom evolution of a predatory marine snail at Easter Island. *PloS one*, **4**.

Duda TF, Palumbi SR (1999) Molecular genetics of ecological diversification: duplication and rapid evolution of toxin genes of the venomous gastropod *Conus*. *Proceedings of the National Academy of Sciences of the United States of America*, **96**, 6820–3.

Duda TF, Remigio EA (2008) Variation and evolution of toxin gene expression patterns of six closely related venomous marine snails. *Molecular ecology*, **17**, 3018–32.

Faircloth BC, McCormack JE, Crawford NG *et al.* (2012) Ultraconserved Elements Anchor Thousands of Genetic Markers Spanning Multiple Evolutionary Timescales. *Systematic biology*.

Fry BG, Roelants K, Champagne DE *et al.* (2009) The toxicogenomic multiverse: convergent recruitment of proteins into animal venoms. *Annual review of genomics and human genetics*, **10**, 483–511.



598 Gibbs HL, Rossiter W (2008) Rapid evolution by positive selection and gene gain and loss: PLA(2)  
599 venom genes in closely related Sistrurus rattlesnakes with divergent diets. *Journal of molecular*  
600 *evolution*, **66**, 151–66.

601 Gibbs HL, Sanz L, Sovic MG, Calvete JJ (2013) Phylogeny-based comparative analysis of venom  
602 proteome variation in a clade of rattlesnakes (Sistrurus sp.). *PloS one*, **8**.

603 Guillén Y, Rius N, Delprat A *et al.* (2014) Genomics of ecological adaptation in cactophilic *Drosophila*.  
604 *Genome Biology and Evolution*, **7**, 349–366.

605 Han M V., Thomas GWC, Lugo-Martinez J, Hahn MW (2013) Estimating gene gain and loss rates in the  
606 presence of error in genome assembly and annotation using CAFE 3. *Molecular Biology and*  
607 *Evolution*, **30**, 1987–1997.

608 Henrissat B, Martínez AT, Otillar R *et al.* (2012) The Paleozoic Origin of Enzymatic from 31 Fungal  
609 Genomes. *Science (New York, N.Y.)*, **336**, 1715–1719.

610 Huang X, Madan A (1999) CAP3: A DNA sequence assembly program. *Genome Research*, **9**, 868–877.

611 Hughes AL, Yeager M (1997) Comparative evolutionary rates of introns and exons in murine rodents. *J*  
612 *Mol Evol*, **45**, 125–130.

613 Jin A, Dutertre S, Kaas Q *et al.* (2013) Transcriptomic messiness in the venom duct of *Conus miles*  
614 contributes to conotoxin diversity. *Molecular & cellular proteomics*, **12**, 3824–33.

615 Kaas Q, Westermann J-C, Craik DJ (2010) Conopeptide characterization and classifications: an analysis  
616 using ConoServer. *Toxicon*, **55**, 1491–509.

617 Kaas Q, Yu R, Jin A-H, Dutertre S, Craik DJ (2012) ConoServer: updated content, knowledge, and  
618 discovery tools in the conopeptide database. *Nucleic acids research*, **40**, D325-30.

619 Katoh K, Kuma K-I, Toh H, Miyata T (2005) MAFFT version 5: Improvement in accuracy of multiple  
620 sequence alignment. *Nucleic Acids Research*, **33**, 511–518.

621 Kirschner M, Gerhart J (1998) Evolvability. *Proceedings of the National Academy of Sciences of the*  
622 *United States of America*, **95**, 8420–8427.

623 Kohn AJ (1959a) Ecological notes on *Conus* (Mollusca: Gastropoda) in the Trincomalee region of

Ceylon. *Annals and Magazine of Natural History*, **2**, 308–320.

Kohn AJ (1959b) The ecology of *Conus* in Hawaii. *Ecological Monographs*, **29**, 47–90.

Kohn AJ (1966) Food specialization in *Conus* in Hawaii and California. *Ecology*, **47**, 1041–1043.

Kohn AJ (1968) Microhabitats, abundance and food of *Conus* on atoll reef's in the Maldives and Chagos islands. *Ecology*, **49**, 1046–1062.

Kohn AJ (1978) Ecological Shift and Release in an Isolated Population: *Conus miliaris* at Easter Island. *Ecological Monographs*, **48**, 323–336.

Kohn AJ (1981) Abundance, diversity, and resource use in an assemblage of *Conus* species in Enewetak Lagoon. *Pacific Science*, **34**, 359–369.

Kohn AJ (2001) Maximal species richness in *Conus*: diversity, diet and habitat on reefs of northeast Papua New Guinea. *Coral Reefs*, **20**, 25–38.

Kohn AJ (2003) Biology of *Conus* on shores of the Dampier Archipelago, Northwestern Australia.

Kohn AJ (2015) Ecology of *Conus* on Seychelles reefs at mid-twentieth century: comparative habitat use and trophic roles of co-occurring congeners. *Marine Biology*, **162**, 2391–2407.

Kohn A, Almasi K (1993) Comparative ecology of a biogeographically heterogeneous *Conus* assemblage. In: *Proceedings of the Fifth International Marine Biological Workshop: The Marine Flora and Fauna of Rottnest Island.*, pp. 509–521.

Kohn AJ, Curran KM, Mathis BJ (2005) Diets of the predatory gastropods *Cominella* and *Conus* at Esperance, Western Australia. *Ecology*.

Kohn AJ, Nybakken JW (1975) Ecology of *Conus* on eastern Indian Ocean fringing reefs: diversity of species and resource utilization. *Marine Biology*, **29**, 211–234.

Kordis D, Gubensek F (2000) Adaptive evolution of animal toxin multigene families. *Gene*, **261**, 43–52.

Langmead B, Salzberg SL (2012) Fast gapped-read alignment with Bowtie 2. *Nature methods*, **9**, 357–9.

Lavergne V, Harliwong I, Jones A *et al.* (2015) Optimized deep-targeted proteotranscriptomic profiling reveals unexplored *Conus* toxin diversity and novel cysteine frameworks. *Proceedings of the National Academy of Sciences*, **112**.

650 Lewis RJ (2009) Conotoxins: Molecular and therapeutic targets. In: *Marine Toxins as Research Tools*

651 Li M, Fry BG, Kini RM (2005) Eggs-only diet: Its implications for the toxin profile changes and ecology

652 of the marbled sea snake (*Aipysurus eydouxii*). *Journal of Molecular Evolution*, **60**, 81–89.

653 Li W, Godzik A (2006) Cd-hit: a fast program for clustering and comparing large sets of protein or

654 nucleotide sequences. *Bioinformatics*, **22**, 1658–9.

655 Li H, Handsaker B, Wysoker A *et al.* (2009) The Sequence Alignment/Map format and SAMtools.

656 *Bioinformatics (Oxford, England)*, **25**, 2078–9.

657 Magoč T, Salzberg SL (2011) FLASH: fast length adjustment of short reads to improve genome

658 assemblies. *Bioinformatics*, **27**, 2957–63.

659 Malmstrøm M, Matschiner M, Tørresen OK *et al.* (2016) Evolution of the immune system influences

660 speciation rates in teleost fishes. *Nature Genetics*, **48**.

661 Marsh H (1971) Observations on the food and feeding of some vermivorous *Conus* on the Great Barrier

662 Reef. *The veliger*.

663 Metz EC, Robles-Sikisaka R, Vacquier VD (1998) Nonsynonymous substitution in abalone sperm

664 fertilization genes exceeds substitution in introns and mitochondrial DNA. *Proceedings of the*

665 *National Academy of Sciences USA*, **95**, 10676–10681.

666 Meyer M, Kircher M (2010) Illumina sequencing library preparation for highly multiplexed target capture

667 and sequencing. *Cold Spring Harbor protocols*, **2010**, doi:10.1101/pdb.prot5448.

668 Nakashima K, Nobuhisa I, Deshimaru M *et al.* (1995) Accelerated evolution in the protein-coding regions

669 is universal in crotalinae snake venom gland phospholipase A2 isozyme genes. *Proceedings of the*

670 *National Academy of Sciences*, **92**, 5605–5609.

671 Nakashima K, Ogawa T, Oda N *et al.* (1993) Accelerated evolution of *Trimeresurus flavoviridis* venom

672 gland phospholipase A2 isozymes. *Proceedings of the National Academy of Sciences*, **90**, 5964–

673 5968.

674 Nybakken J (2009) Ontogenetic change in the *conus radla*, its form, distribution among the radula types,

675 and significance in systematics and ecology. *Malacologia*, **32**, 35–54.

676 Nybakken J, Perron F (1988) Ontogenetic change in the radula of *Conus magus* (Gastropoda). *Marine*  
677 *Biology*, **98**, 239–242.

678 Oksanen J, Blanchet FG, Friendly M *et al.* (2016) vegan: Community Ecology PAKage.

679 Olivera BM (1997) *Conus* venom peptides, receptor and ion channel targets, and drug design: 50 million  
680 years of neuropharmacology. *Molecular biology of the cell*, **8**, 2101–9.

681 Olivera BM, Teichert RW (2007) Diversity of the neurotoxic *Conus* peptides. *Molecular interventions*, **7**,  
682 251–260.

683 Orme D (2013) The caper package : comparative analysis of phylogenetics and evolution in R. , 1–36.

684 Pagel M (1997) Inferring evolutionary processes from phylogenies. *Zoologica Scripta*, **26**, 331–348.

685 Pease JB, Haak DC, Hahn MW, Moyle LC (2016) Phylogenomics Reveals Three Sources of Adaptive  
686 Variation during a Rapid Radiation. *PLoS Biology*, **14**, 1–24.

687 Phuong MA, Mahardika GN, Alfaro ME (2016) Dietary breadth is positively correlated with venom  
688 complexity in cone snails. *BMC Genomics*, **17**, 401.

689 Puillandre N, Bouchet P, Duda TF *et al.* (2014) Molecular phylogeny and evolution of the cone snails  
690 (Gastropoda, Conoidea). *Molecular phylogenetics and evolution*, **78**, 290–303.

691 Puillandre N, Koua D, Favreau P, Olivera BM, Stöcklin R (2012) Molecular phylogeny, classification and  
692 evolution of conopeptides. *Journal of molecular evolution*, **74**, 297–309.

693 Puillandre N, Watkins M, Olivera BM (2010) Evolution of *Conus* peptide genes: duplication and positive  
694 selection in the A-superfamily. *Journal of molecular evolution*, **70**, 190–202.

695 Reichelt R, Kohn A (1995) Feeding and distribution of predatory gastropods on some great barrier reef  
696 platforms. *Proceedings of the Fifth International Coral Reef Congress*, **1985**, 191–196.

697 Revell LJ (2012) phytools: An R package for phylogenetic comparative biology (and other things).  
698 *Methods in Ecology and Evolution*, **3**, 217–223.

699 Revell L, Harmon L, Collar D (2008) Phylogenetic Signal, Evolutionary Process, and Rate. *Systematic*  
700 *Biology*, **57**, 591–601.

701 Robinson S, Norton R (2014) Conotoxin Gene Superfamilies. *Marine Drugs*, **12**, 6058–6101.

Ruby JG, Bellare P, Derisi JL (2013) PRICE: software for the targeted assembly of components of (Meta) genomic sequence data. *G3 (Bethesda, Md.)*, **3**, 865–80.

Sanderson MJ (2003) r8s: inferring absolute rates of molecular evolution and divergence times in the absence of a molecular clock. *Bioinformatics*, **19**, 301–302.

Slater GSC, Birney E (2005) Automated generation of heuristics for biological sequence comparison. *BMC bioinformatics*, **6**, 31.

Stamatakis A (2006) RAxML-VI-HP: Maximum likelihood-based phylogenetic analyses with thousands of taxa and mixed models. *Bioinformatics*, **22**, 2688–2690.

Taylor JD (1978) Habitats and diet of predatory gastropods at addu atoll, maldives. *Journal of Experimental Marine Biology and Ecology*, **31**, 83–103.

Taylor JD (1984) A partial food web involving predatory gastropods on a pacific fringing reef. *Journal of Experimental Marine Biology and Ecology*, **14**, 273–290.

Taylor J (1986) Diets of sand-living predatory gastropods at Piti Bay, Guam. *Asian Marine Biology*, **3**, 47–58.

Taylor JD, Reid DG (1984) The abundance and trophic classification of molluscs upon coral reefs in the Sudanese Red Sea. *Journal of Natural History*, **18**, 175–209.

Teasdale LC, Köhler F, Murray KD, O'Hara T, Moussalli A (2016) Identification and qualification of 500 nuclear, single-copy, orthologous genes for the Eupulmonata (Gastropoda) using transcriptome sequencing and exon capture. *Molecular Ecology Resources*, **16**, 1107–1123.

Wu Y, Wang L, Zhou M *et al.* (2013) Molecular evolution and diversity of *Conus* peptide toxins, as revealed by gene structure and intron sequence analyses. *PloS one*, **8**, e82495.

Yang AS (2001) Modularity, evolvability, and adaptive radiations: a comparison of the hemi- and holometabolous insects. *Evolution & development*, **3**, 59–72.



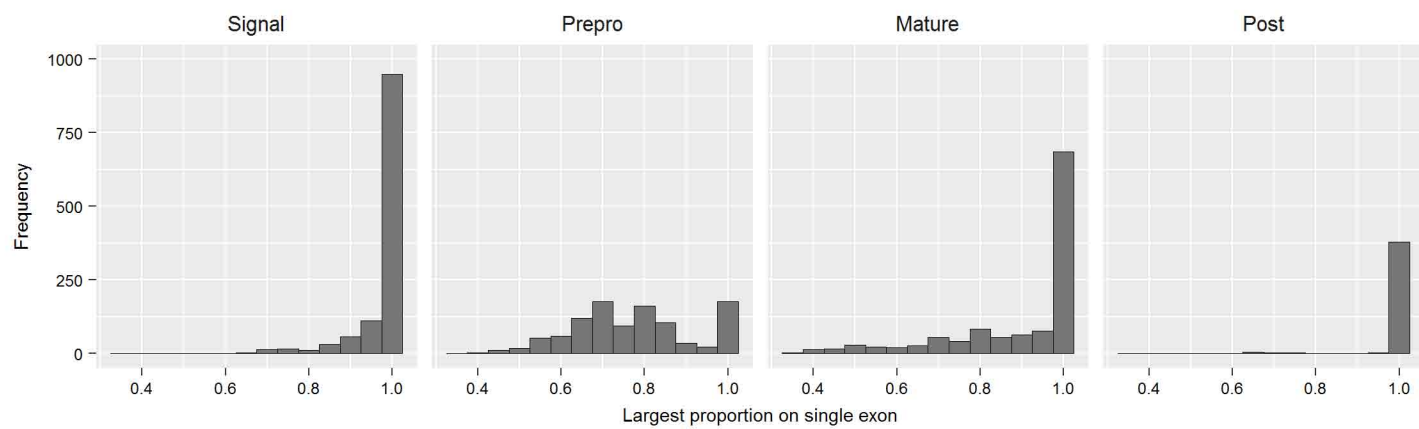

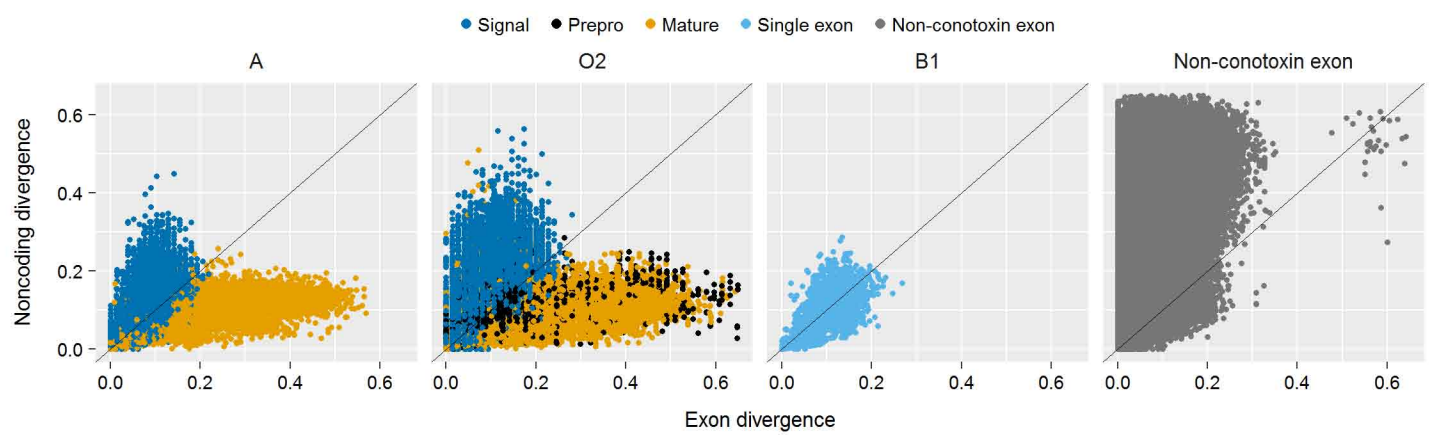



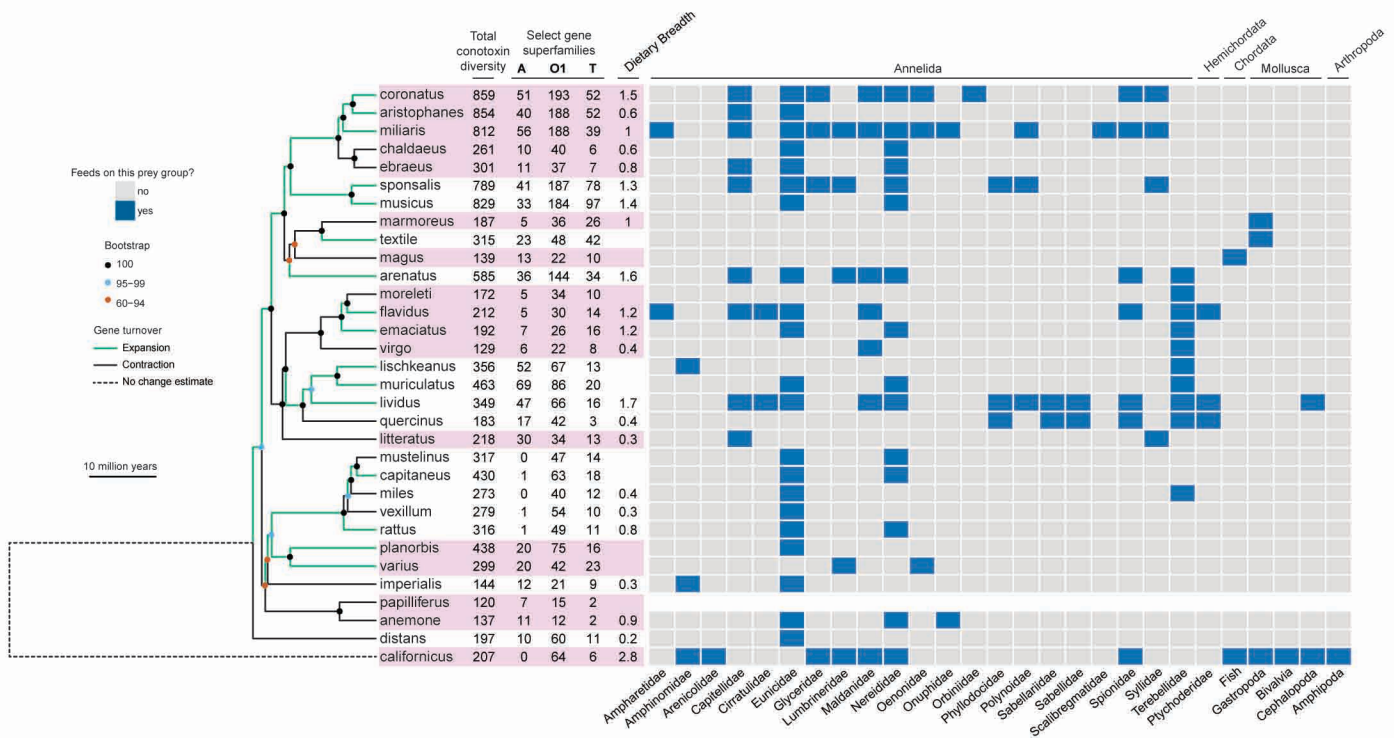

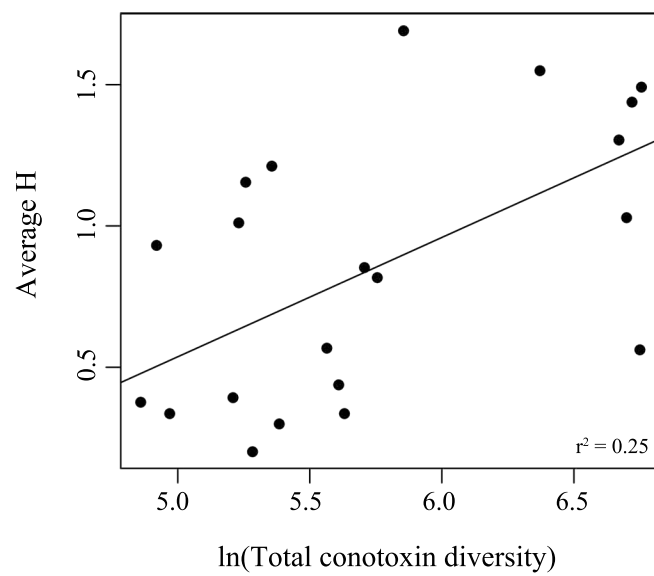

Source: http://biorxiv.org/content/10.1101/107672v1.full.pdf
